# Supplementary material for: Therapeutically expanded human regulatory T-cells are super-suppressive due to HIF1A induced expression of CD73
Source: PubMed Central journal article supplement (PMC8516976; doi:10.1038/s42003-021-02721-x), 2021-10-14
Supplement: 42003_2021_2721_MOESM1_ESM.pdf [file 42003_2021_2721_MOESM1_ESM.pdf]

## Supplementary Figures

### a: Flow sort for ex vivo CD25<sup>hi</sup>CD127<sup>low</sup> Tregs

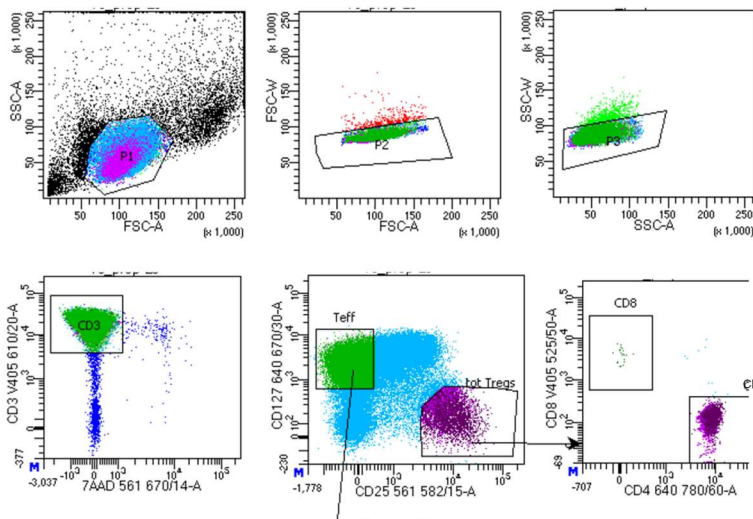

### b: IL2 production by ex vivo Teffectors and Tregs – intracellular cytokine staining

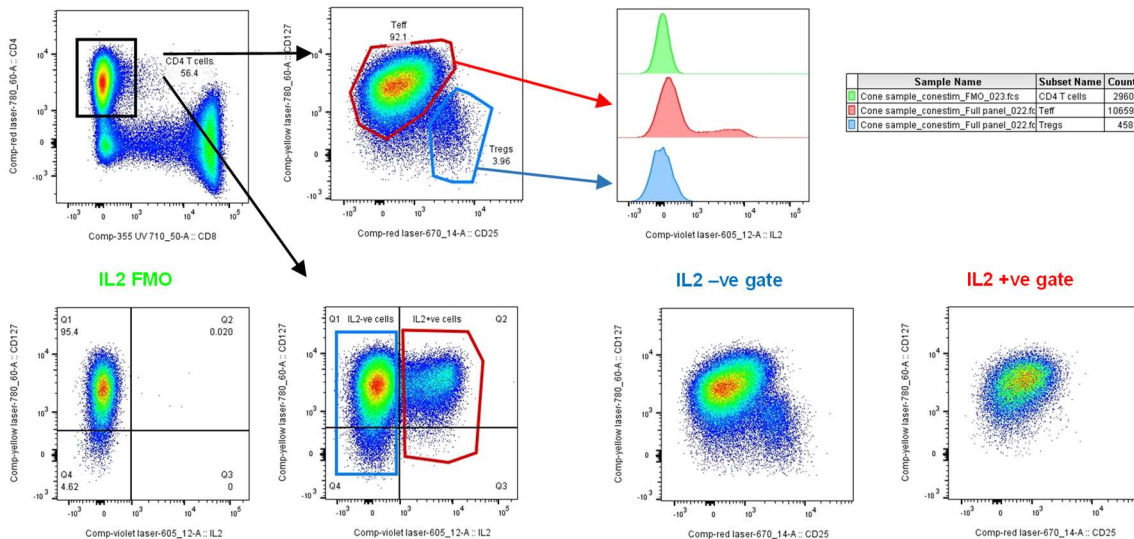

## Supplementary Figure 1:

### a: Sort of ex vivo CD25<sup>hi</sup>CD127<sup>lo</sup> Tregs

Representative example showing flow sort of Teff and Tregs based on CD127 and CD25.

### b: IL2 Production by Teffs and Tregs

Representative example showing intracellular IL2 staining of stimulated PBMC (PMA/ionomycin, 6 hours). IL2 production is confined to the CD127+CD25- “Teffector” gate whereas CD25<sup>hi</sup> CD127<sup>lo</sup> Tregs do not make IL2.

**a: Ki67 expression mid- and end- of expansion**

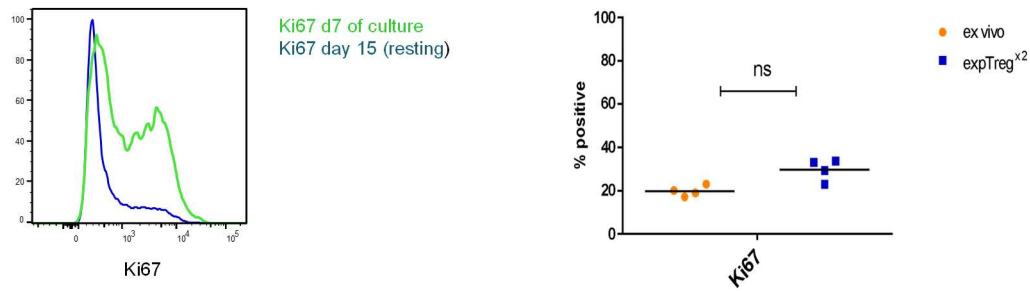

**b: Representative flow sort for naïve (nTreg) and memory (mTreg) Tregs**

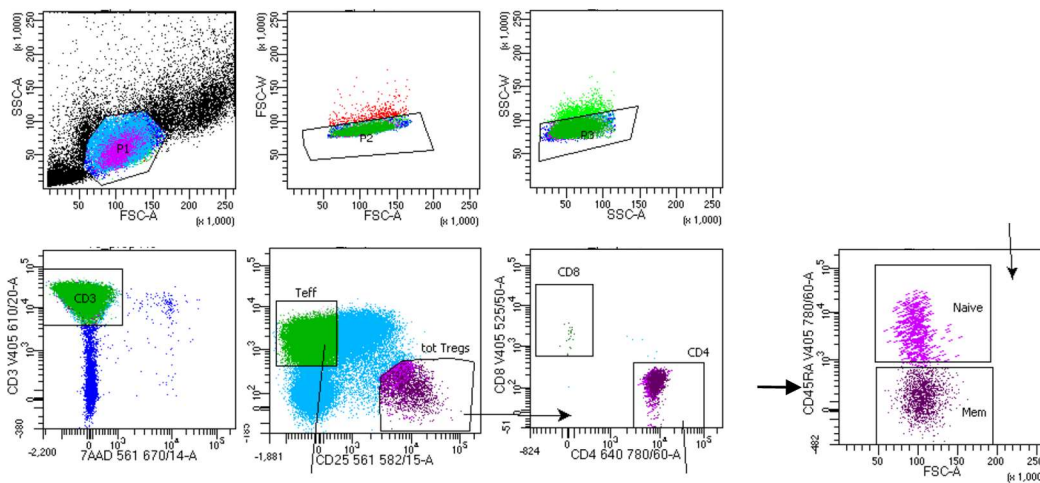

**Supplementary Figure 2:**

**a: ExpTregs return to resting state at end of expansion cycle**

Representative example comparing Ki67<sup>+</sup> proliferating expTregs mid-cycle at day 7 (green) with Tregs at the end of the expansion cycle at day 15 (blue), left hand plot. Ki67 expression was not significantly different between *ex vivo* mTreg and expTreg<sup>x2</sup>, right plot (n = 4 separate donors) in a two-tailed paired Student's t-test.

**b: Representative example showing sort of naïve (n-) and memory (m-) Tregs based on CD127<sup>low</sup>/CD25<sup>high</sup> and CD45RA expression.**

**a Gating strategy – Ex vivo Treg**

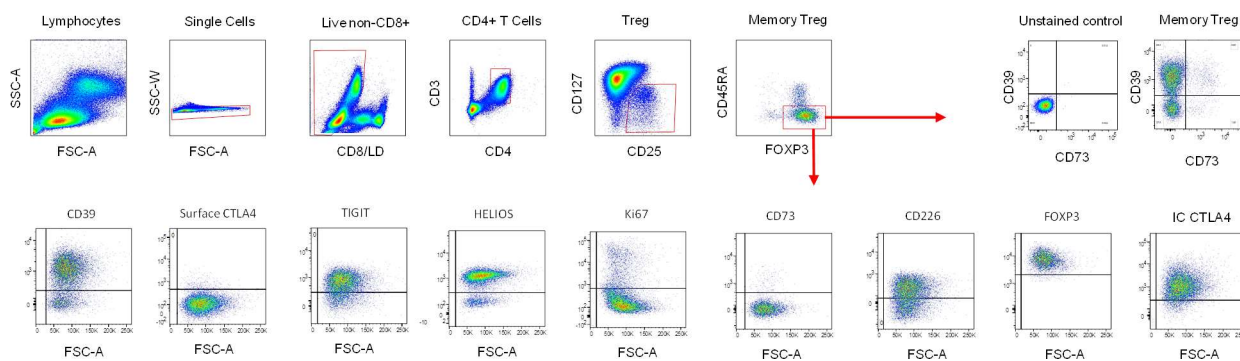

**b Gating strategy – Expanded Treg**

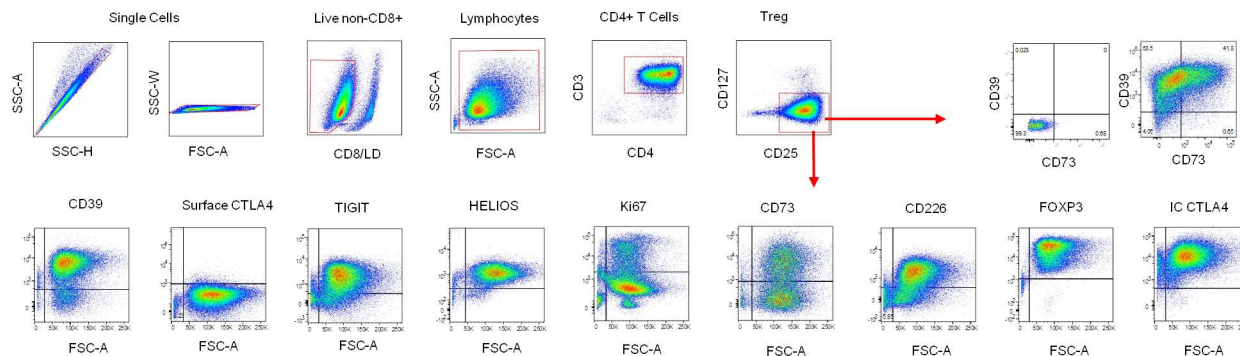

**c**

**Panel for Treg Phenotyping:**

| SURFACE | Cat no      | Clone           | INTRACELLULAR | Cat no | Clone     |                 |        |
|---------|-------------|-----------------|---------------|--------|-----------|-----------------|--------|
| CTLA-4  | BV421       | BL 369606       | BNI3          | HELIOS | FITC      | BL 137214       | 22F6   |
| CD3     | BV570       | BL 300436       | UCHT1         | CTLA-4 | PE-Dazzle | BL 369616       | BNI3   |
| CD8     | v500        | BD 560774       | RPA-T8        | FOXP3  | PE        | eBio 12-4776-41 | PCH101 |
| CD45RA  | BV605       | BL 304134       | HI100         | FOXP3  | PE        | BL 320207       | 259D   |
| CD39    | BV650       | BD 563681       | Tu66          | Ki67   | BUV395    | BD 564071       | B56    |
| CD73    | BV786       | BL 344028       | AD2           |        |           |                 |        |
| TIGIT   | PerCP-ef710 | eBio 46-9500-42 | MBSA43        |        |           |                 |        |
| CD127   | PE-Cy7      | eBio 25-1278-42 | eBioRDR5      |        |           |                 |        |
| CD25    | APC         |                 | BD 2A3        |        |           |                 |        |
| CD25    | APC         |                 | MA251         |        |           |                 |        |
| CD4     | APC-R700    | BD 564976       | RPA-T4        |        |           |                 |        |
| CD226   | APC-Fire750 | BL 338320       | 11A8          |        |           |                 |        |

**Supplementary Figure 3:**

**Gating strategy and antibody panel used for ex vivo and expTreg phenotyping**

a: Gating strategy and representative example of flow cytometric analysis of Treg markers on ex vivo mTregs. PBMC were stained by flow cytometry and live CD3<sup>+</sup>CD4<sup>+</sup>CD25<sup>hi</sup>CD127<sup>lo</sup>CD45RA<sup>-</sup> Tregs were gated. Values in the top right quadrants were used as % positivity.

b: Gating strategy and representative example of flow cytometric analysis of Treg markers on expTregs. Values in the top right quadrants were used as % positivity.

c: The Treg phenotyping flow panel showing all antibodies and clones.

PBMC and expTregs from the same donors were frozen, thawed and stained on the same day using the same antibody panel.

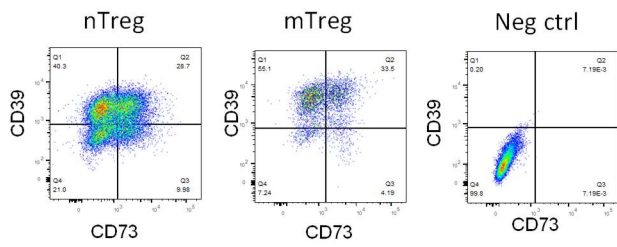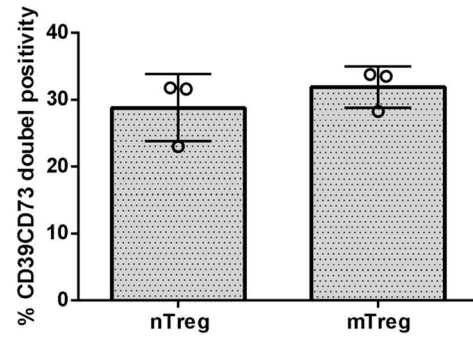

#### Supplementary Figure 4:

#### Acquisition of CD39 and CD73 by Tregs expanded from naïve and memory ex vivo Tregs

Representative staining at day 21 post-expansion of nTreg vs mTreg from 1 donor (left plots) and summary data comparing % CD39/CD73 co-expression in Tregs expanded from nTreg vs mTreg in 3 donors (bar chart, right shows mean % double positivity +/- 1 SD).

a: Example of T cell specific phenotype

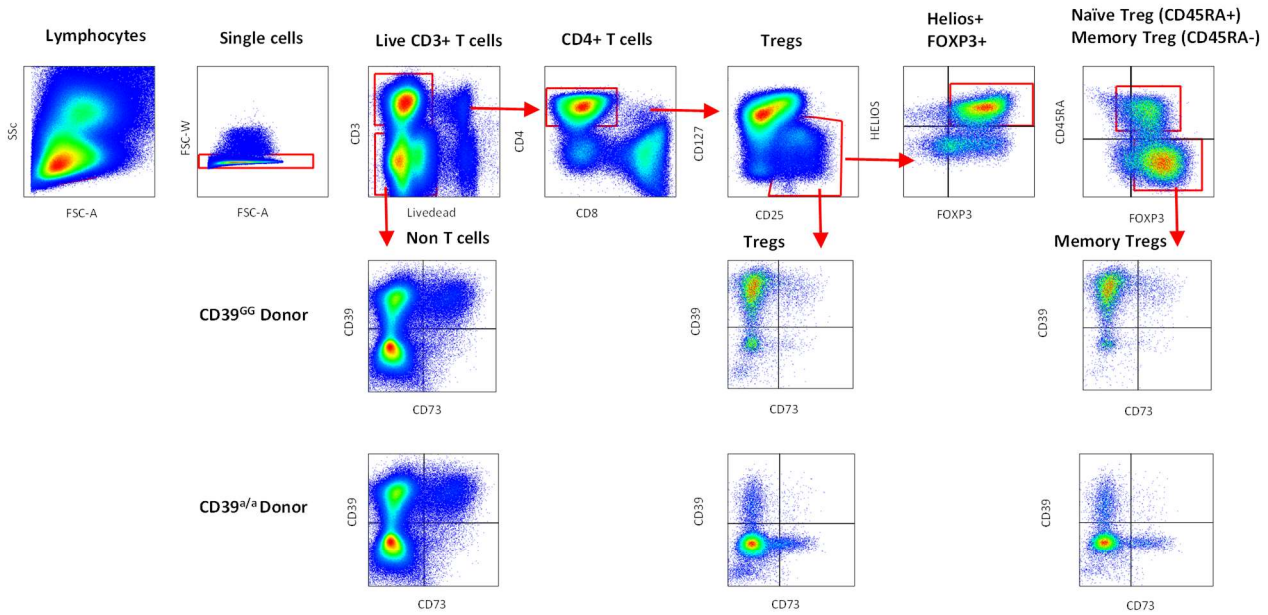

b: Low CD39 expression is independent of memory and HELIOS/FOXP3+ expression

c: expTreg from CD39<sup>a/a</sup> donors are delayed in becoming CD39+CD73+ due to delayed acquisition of CD39, not CD73

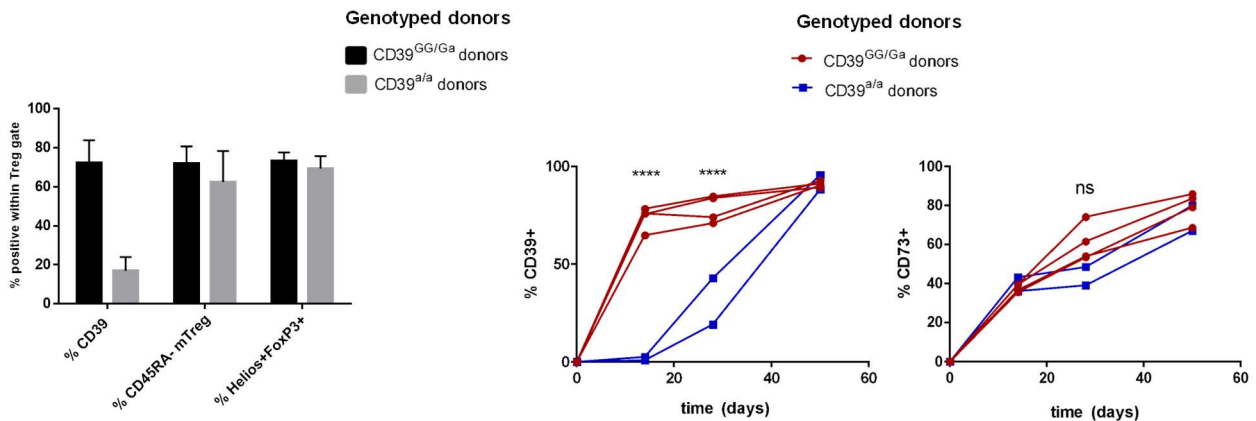

**Supplementary Figure 5:**

**CD39<sup>lo/a/a</sup> Individuals have inherently low T cell expression of CD39**

a: Representative gating strategy used for analysing CD39<sup>+</sup> (CD39<sup>GG/Ga</sup>) and CD39<sup>low</sup> (CD39<sup>lo/a/a</sup>) donors, demonstrating T cell specific loss of CD39 expression. CD39<sup>GG/Ga</sup> and CD39<sup>lo/a/a</sup> donors express normal levels of CD39 on non-T cells (left lower dot plots) but CD39<sup>lo/a/a</sup> donors have reduced levels on Tregs (middle dot plot). Low CD39 is not due to differences in proportion of memory Tregs, since memory (CD45RA-FOXP3<sup>+</sup>) Tregs also lack CD39 in CD39<sup>lo/a/a</sup> donors (right lower dot plots).

b: CD39 expression in CD39<sup>lo/a/a</sup> donors is independent of memory and CD39<sup>lo/a/a</sup> donors have similar proportion of HELIOS+FOXP3<sup>+</sup> double positive Tregs as shown by summary data of 3 CD39<sup>GG/Ga</sup> and 3 CD39<sup>lo/a/a</sup> donors, analysed by flow cytometry (bar chart shows mean % positivity within CD3<sup>+</sup>CD4<sup>+</sup>CD25<sup>hi</sup>CD127<sup>lo</sup> Treg gate +/- 1 SD).

c: Comparison of CD39 expression (left) and CD73 expression (right) over time on expanded CD39<sup>-</sup>CD73<sup>-</sup> DN Tregs from CD39<sup>GG/Ga</sup> and CD39<sup>lo/a/a</sup> donors, demonstrating delayed acquisition of CD39 but not CD73. (Two way ANOVA with Bonferroni multiple testing correction).

\*P < 0.05, \*\*P < 0.01, \*\*\*P < 0.001, \*\*\*\*P < 0.0001.

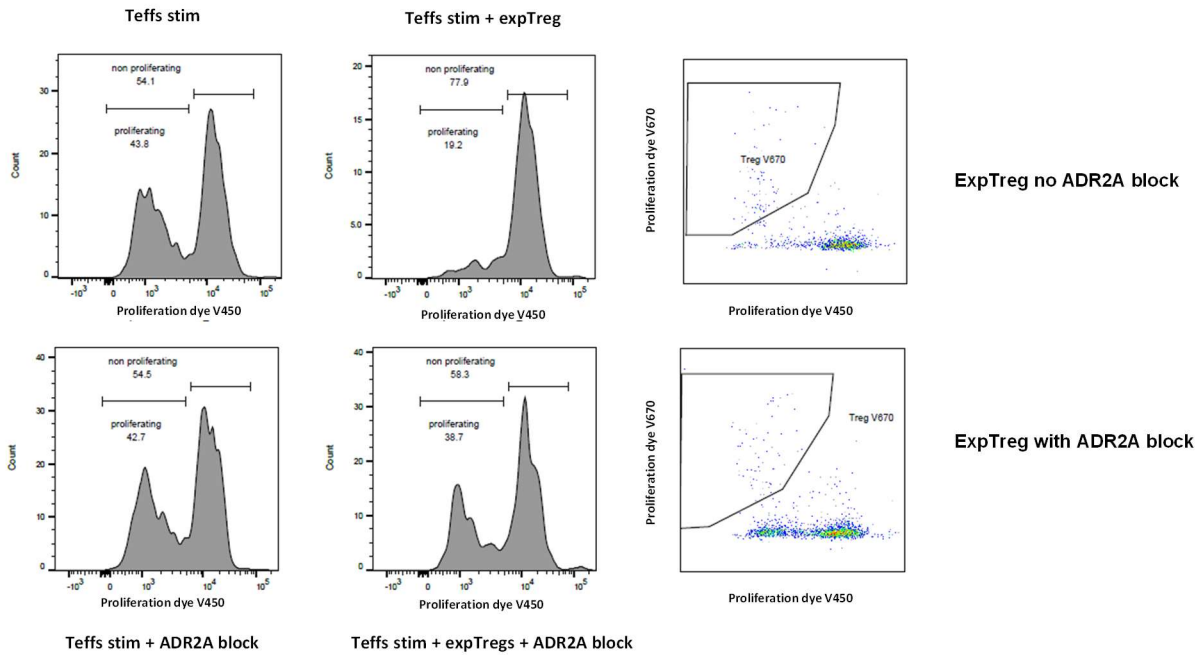

**Supplementary Figure 6:  
Example ADR2A blocking assay**

Representative flow plot of AD2RA blocking suppression assay. V450 proliferation dye labelled Teffector cells (Teffs) were stimulated for 5 days using anti-CD3/CD28 Treg suppression assay beads with (middle histograms) and without (left histograms) expTregs at a ratio of 8:1 Teffs:Tregs and with (bottom plots) and without (top plots) ADR2A block. Histograms show V450 dye dilution of the Teffs (V670- non Treg) cells as demonstrated by the gating in right hand dot plots.

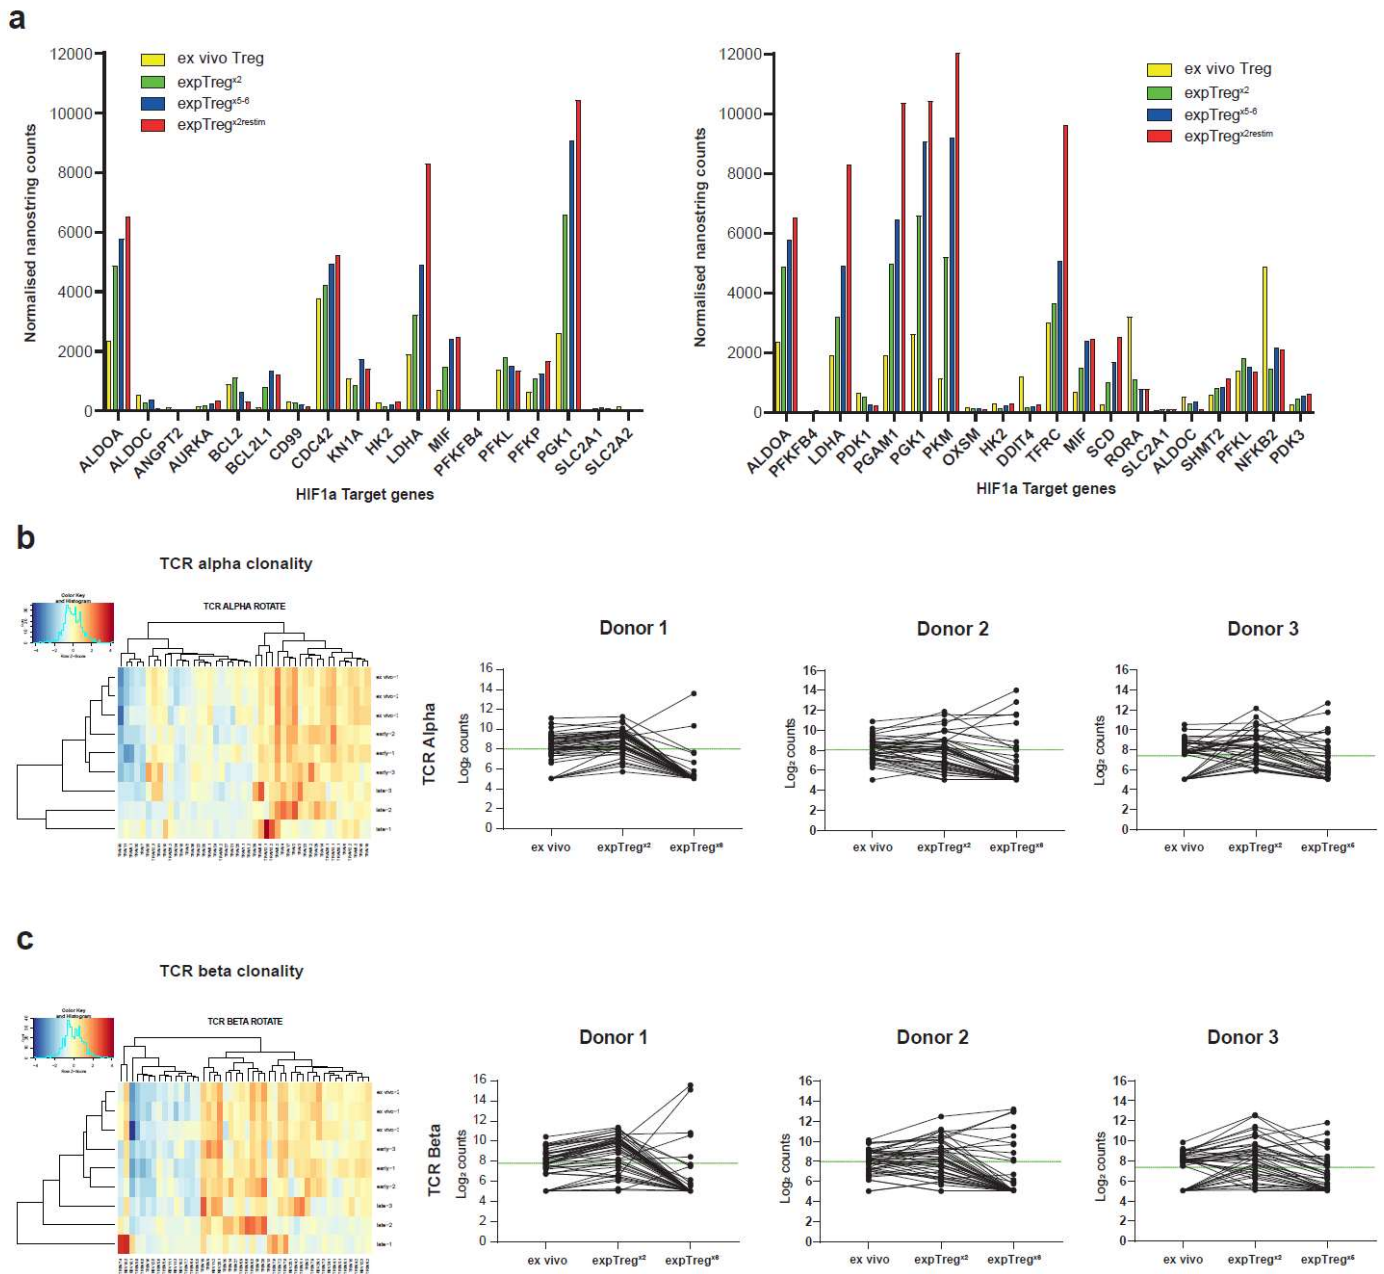

### Supplementary Figure 7: Additional Nanostring data

a: Expression levels of HIF1A responsive genes captured by the CAR-T Nanostring panel. Data shows Nanostring normalised counts for the top 20 HIF1A responsive genes reported by Smelc *et al*<sup>27</sup> (left plot) and by Oki *et al*<sup>26</sup> (right plot). Data from donor matched *ex vivo* mTregs, expTreg<sup>x2</sup> and expTreg<sup>x5-6</sup> from 3 donors and expTreg<sup>x2</sup> (expTreg<sup>x2restim</sup>) from 2 donors are shown.

b-c: The expression of 45 TCR alpha and 46 TCR beta variable chains was measured in *ex vivo* mTregs, expTreg<sup>x2</sup> and expTreg<sup>x5-6</sup> from 3 donors. Log<sub>2</sub> normalised counts measured by Nanostring are displayed and the green dotted line represents the mean of the *ex vivo* dataset.

**a – example gating of expTregs using an FMO control to set CD73 threshold**

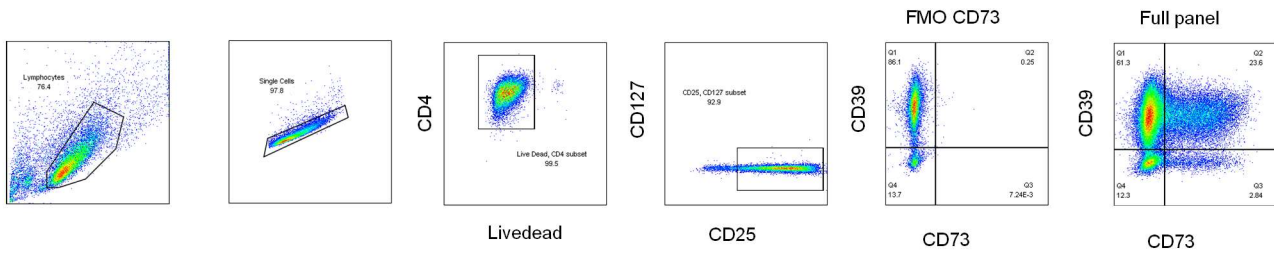

**b - gain of CD73 by expTregs over time**

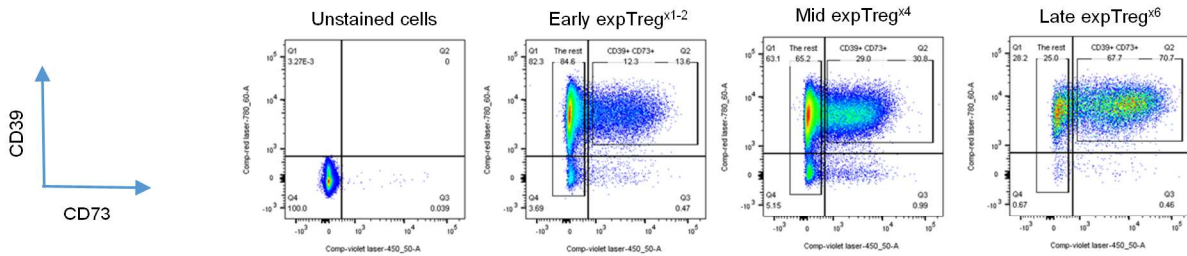

**c – example FMO thresholding for FOXP3 expression in expTregs and FoxP3 stability over time**

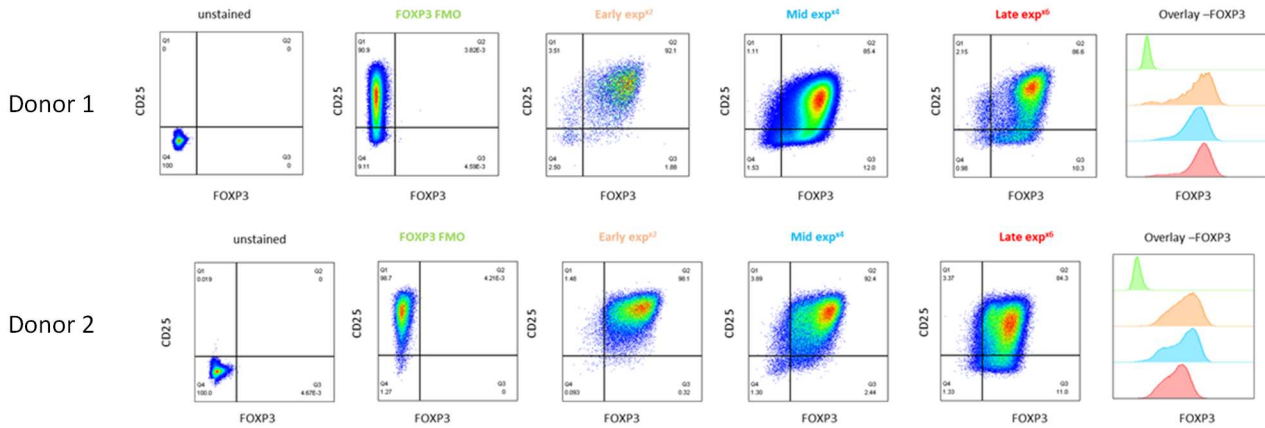

**Supplementary Figure 8:  
Control staining of CD73 and FOXP3 over time and thresholding using FMOs**

- a: Example gating of expTregs using a fluorescence minus one (FMO) control to set CD73 threshold.
- b: Representative example of gain of CD73 over time in expTregs compared to unstained control cells.
- c: Example thresholding for FoxP3 expression based on unstained cells and fluorescence minus one control (FMO) for FoxP3 in 2 donors, and stability of FoxP3 over time in early ( $\times 2$ ), mid ( $\times 4$ ) and late ( $\times 6$ ) expanded Tregs. Histograms show comparative FoxP3 MFI over time.
