# Supplementary material for: Therapeutically expanded human regulatory T-cells are super-suppressive due to HIF1A induced expression of CD73
Source: PubMed Central journal article supplement (PMC8516976; doi:10.1038/s42003-021-02721-x), 2021-10-14
Supplement: 42003_2021_2721_MOESM2_ESM.pdf [file 42003_2021_2721_MOESM2_ESM.pdf]

## Description of Additional Supplementary Files

**File name:** Supplementary Data 1.

**Description:** Raw and normalised gene expression counts measured by Nanostring for the ex vivo mTregs, expTregsx2, expTregsx5 and expTregsx2restim as well as the flow-sorted CD39+CD73+ DP and non-DP expTregs. Differential expression between each Treg condition is shown on a separate sheet.

**File name:** Supplementary Data 2.

**Description:** Gene Set Enrichment Analysis of Nanostring data, performed using the GSEA tool, and enrichment in the genesets from Hallmark, Reactome and GO Biological Processes.

**File name:** Supplementary Data 3.

**Description:** Source data used to create manuscript figures.
